# Supplementary material for: IFNAR blockade synergizes with oncolytic VSV to prevent virus-mediated PD-L1 expression and promote antitumor T cell activity
Source: PubMed Central journal article supplement — Mol Ther Oncolytics. 2022 Mar 16;25:16–30. doi: 10.1016/j.omto.2022.03.006 (PMC8971726; doi:10.1016/j.omto.2022.03.006), 2022-03-16
Supplement: mmc1.pdf [file mmc1.pdf]

**OMTO, Volume 25**

**Supplemental information**

**IFNAR blockade synergizes with oncolytic**

**VSV to prevent virus-mediated PD-L1**

**expression and promote antitumor T cell activity**

**Nader El-Sayes, Scott Walsh, Alyssa Vito, Amir Reihani, Kjetil Ask, Yonghong Wan, and Karen Mossman**



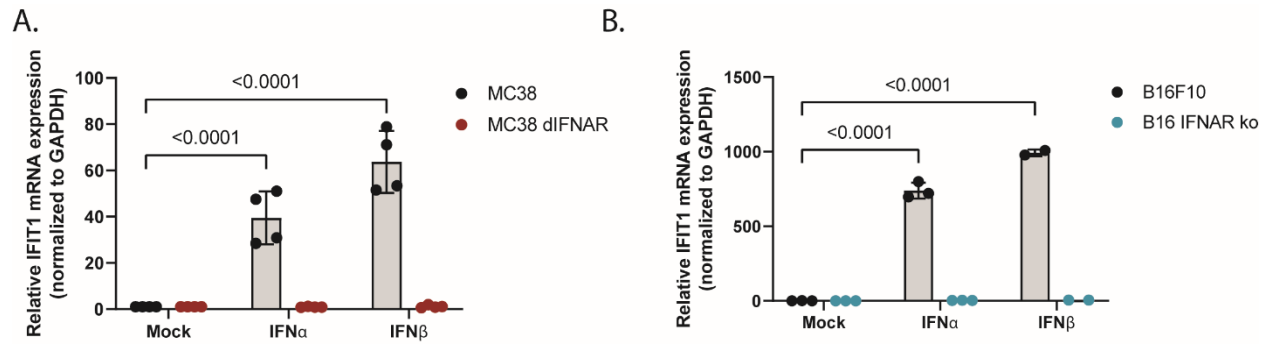

**Figure S3.** Type I IFN induces IFIT1 upregulation. **(A)** MC38 and **(B)** B16F10 parental and IFNAR knockout cells and were treated with 100 U/mL of IFN $\alpha$  or IFN $\beta$ . RNA was harvested and used to assess mRNA expression of IFIT1 via RT-PCR.

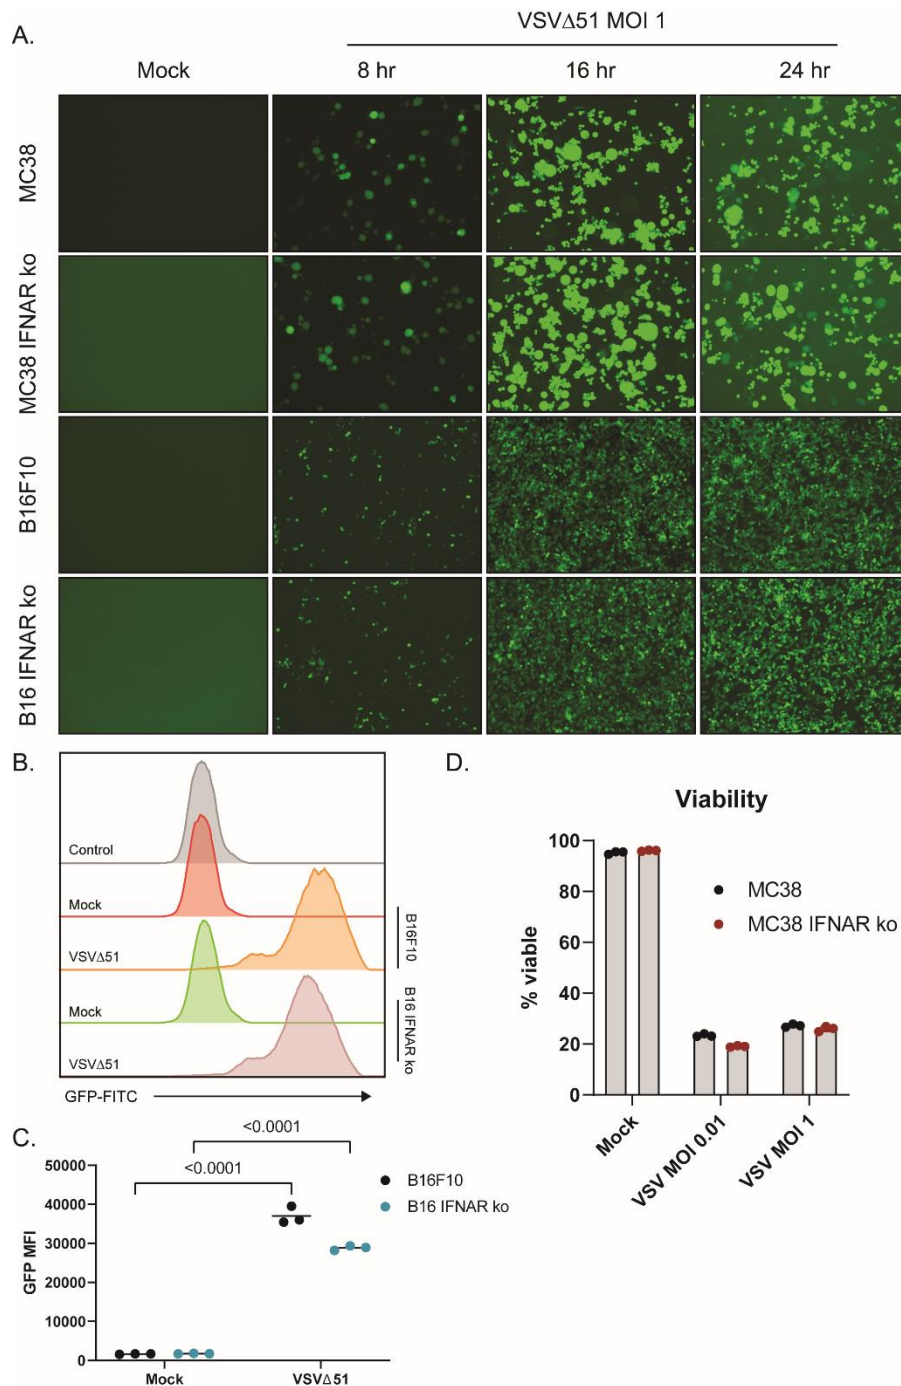

**Figure S4.** Validation of VSV initiation of replication. (A) MC38 and B16F10 parental and IFNAR knockout cells were infected with VSV $\Delta$ 51-GFP at MOI 1 for 8, 16 and 24 hours then imaged using a fluorescence microscope. B16F10 parental and IFNAR knockout cells were infected with VSV $\Delta$ 51-GFP at MOI 1 for 24 hours then GFP fluorescence was measured by flow

cytometry. **(B)** Representative histogram and **(C)** MFIs of GFP expression in B16F10 parental and IFNAR ko cells 24 hours post infection. **(D)** MC38 parental/IFNAR ko cells were infected with VSVΔ51-GFP at MOI 1 for 24 hours then viability was measured by flow cytometry.

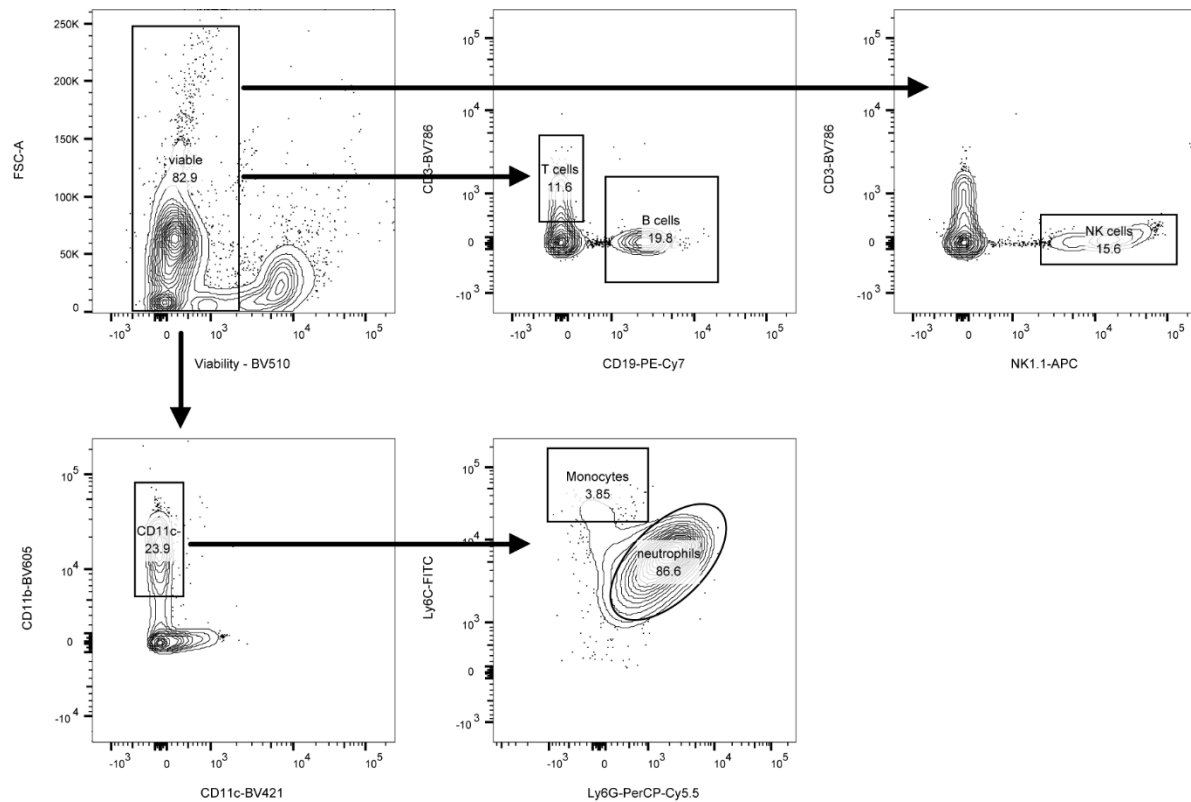

**Figure S5.** Gating strategy used to characterize different leukocytes from PBMCs to assess PD-L1 surface expression (corresponds to data from Figure 5).

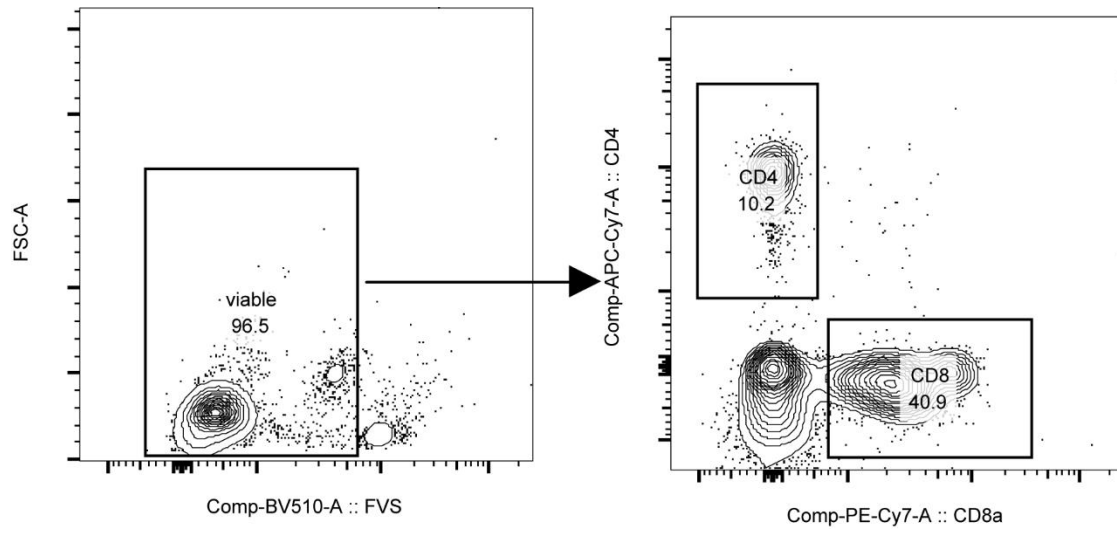

**Figure S6.** Gating strategy used to characterize T cells from PBMCs (corresponds to data from Figure 6).
